# Supplementary material for: Delta-Frequency Augmentation and Synchronization in Seizure Discharges and Telencephalic Transmission
Source: PubMed Central journal article supplement — iScience. 2020 Oct 9;23(11):101666. doi: 10.1016/j.isci.2020.101666 (PMC7586134; doi:10.1016/j.isci.2020.101666), 2020-10-09
Supplement: mmc1.pdf [file mmc1.pdf]

**iScience, Volume 23**

**Supplemental Information**

**Delta-Frequency Augmentation  
and Synchronization in Seizure Discharges  
and Telencephalic Transmission**

**Ping Chou, Guan-Hsun Wang, Shu-Wei Hsueh, Ya-Chin Yang, and Chung-Chin Kuo**

## 1 **Transparent Methods**

### 2 **Animals**

3 All experiments including the care and use of animals were conducted in strict  
4 compliance with the recommendations in the Guide for the Care and Use of  
5 Laboratory Animals of the National Institutes of Health, USA, and the protocols  
6 approved by the Institutional Animal Care and Use Committee of National Taiwan  
7 University College of Medicine (Approval Number: 20130443 and 20160391), and  
8 that of Chang Gung University (Approval Number: CGU106-081, CGU106-206,  
9 CGU107-277, and CGU108-027), Taiwan. All animals were maintained in a vivarium  
10 with controlled 12-hour dark/light cycle, and ad libitum access to food and water.  
11 Wistar rats and wild-type C57BL/6 mice were purchased from BioLASCO Taiwan  
12 Co., Ltd., Taiwan. Thy1-ChR2-eYFP (line 18, #007612) transgenic mice, which  
13 express Channelrhodopsin-2 at glutamatergic pyramidal neurons within the  
14 basolateral amygdala (Jasnow *et al.*, 2013) were purchased from Jackson Laboratory.

15

### 16 **Implantation of electrodes and optic fibers**

17 During stereotaxic surgery, male Wistar rats (6-8 weeks, 250-300 g) were anesthetized  
18 by intraperitoneal infusion of 1 ml/kg of normal saline mixture solution containing 50  
19 mg/ml Zoletil 50 (Virbac, France) and 10 mg/ml Xylazine (Sigma Aldrich, USA), and  
20 then mounted on a stereotaxic frame (Narishige, Japan). Each rat was implanted with  
21 bipolar insulated tungsten electrodes (0.002 inch in diameter, <0.5 mm apart,  
22 California Fine Wire Company, USA) into desired brain regions bilaterally following  
23 the Paxinos and Watson Brain Atlas for electrophysiology recordings. The kindling  
24 stimulation site, however, was always in the left basolateral amygdala (BLA in rats,  
25 posterior 3 mm, lateral 5 mm, and deep 8.8 mm relative to bregma), where an

1 additional pair of electrodes was implanted for stimulation. Two stainless steel screws  
2 were wound with silver wires (A-M System, USA) and tighten on the skull above  
3 cerebellum as well as on the nasal bone as reference and ground electrodes,  
4 respectively. Finally, the electrodes were welded on connectors (Omnetics Connector  
5 Corporation) and the scalp wound was covered with dental cement. Following similar  
6 procedures, optical fibers (200  $\mu\text{m}$ , 0.37 NA, Newdoon Inc., China) glued with  
7 electrodes were implanted into the brain (BLA in mice, posterior 1.5 mm, lateral 3  
8 mm, and deep 4.8 mm relative to bregma) of male Thy1-ChR2-eYFP transgenic mice  
9 (6-8 weeks, 20-30 g) for optogenetic stimulation. After surgery, animals were allowed  
10 to rest for 1~2 weeks and orally administered with ibuprofen (Sigma Aldrich, USA) in  
11 drinking water for 3 days before experiments. After recording, animals were  
12 sacrificed with intraperitoneal injection of overdose Zoletil 50. A 5-mA constant  
13 current was then passed via the electrodes for 20 sec to cause electrolytic lesions that  
14 mark the position of the electrodes. Animals were then perfused with 0.9 % normal  
15 saline and 4 % formaldehyde via the ascending aorta. The brain was removed and  
16 stored at 4 °C in 4 % formaldehyde at least overnight for postfixation, and then stored  
17 in 25 % sucrose solution for at least 3 days for cryoprotection. Afterwards the brains  
18 were sectioned by a cryotome (CM1950, Leica, Germany) at 30  $\mu\text{m}$  thickness, and  
19 stained with cresyl violet acetate (Nissl staining, Sigma Aldrich, USA) to verify the  
20 positions of the electrodes. Only the data from the rats with verified correct location  
21 of all electrodes are used for further analysis.

22

### 23 **In-vivo kindling procedures**

24 At first, a session of 50 Hz biphasic square pulses (1 ms each phase,  $\pm 50 \mu\text{A}$  in  
25 amplitude, 10 sec per session) with a stimulus generator (STG4002, Multichannel

1 Systems, USA) was applied to the left BLA. If there are no afterdischarges (i.e.  
2 epileptiform discharges lasting for at least 5 sec) induced after the stimulation session,  
3 the procedures were repeated with a current amplitude increment of  $\pm 10 \mu\text{A}$  every 2  
4 min to a maximum of  $\pm 300 \mu\text{A}$ . The current amplitude inducing the first appearance  
5 of afterdischarges is defined as the afterdischarges threshold (ADT). Those rats which  
6 did not have an  $\text{ADT} \leq \pm 300 \mu\text{A}$  (~2%, 4 out of 24 rats) were not used for further  
7 experiments. We then applied sessions of 50 Hz biphasic square pulses (1 ms each  
8 phase, 10 sec per session) at ADT (mean  $\text{ADT} = 130 \pm 27 \mu\text{A}$  for 20 rats) for rapid  
9 kindling stimulation. The stimulation sessions were repeated every 20 min, 10 times a  
10 day for up to 4 days (Morales *et al.*, 2014), and the 20-min period right before the first  
11 stimulation in each day was taken as baseline. Behavioral seizure scores were  
12 evaluated in every session according to modified Racine's stages (Racine, 1972):  
13 stage 0) normal behavior; stage 0.5) epileptiform discharges (afterdischarges),  
14 absence-like, freezing behavior; stage 1) facial clonus and mouth clonus; stage 2)  
15 head nodding; stage 3) unilateral forelimb clonus; stage 4) bilateral forelimb clonus  
16 with rearing; stage 5) rearing and falling; stage 6) wild running and jumping. When an  
17 animal progressed into stage-5 or higher seizures for 3 sessions, it was considered as  
18 successfully kindled and the kindling protocols were concluded. As a working  
19 definition, we also take seizures without vivid convulsions (Racine stages 0.5-2) as  
20 low-stage, and those with vivid convulsion or associated violent behaviors (Racine  
21 stage 3 and above) as high-stage. All of the 20 included rats (rats that had an  $\text{ADT} \leq$   
22  $\pm 300 \mu\text{A}$ ) were successfully kindled. But only the data from 7 rats, which have  
23 verified correct positions for all electrodes, were used for further analysis.

24

## 25 **In-vivo photostimulation**

1 The blue light for optogenetic stimulation was generated by a 473 nm diode-pumped  
2 solid-state (DPSS) laser (Newdoon Inc., China). The stimulation parameters for  
3 optical stimulations were controlled by a touch panel and verified with sample  
4 recordings. A 50 Hz (1 ms/pulse) light stimulation for 10 sec was applied via an optic  
5 fiber to the left BLA to mimic electrical kindling stimulation. The light power was  
6 typically changed between 2 to 50 mW (measured at the optic fiber tip) with a step  
7 increment as small as 2 mW for ADT measurement. All of the 9 mice show an ADT  $\leq$   
8 50 mW. We then applied sessions of 50 Hz biphasic square light pulses (1 ms each  
9 phase, 10 sec per session) at ADT (mean ADT =  $5.6 \pm 0.3$  mW for 9 mice) for  
10 optokindling stimulation. All of the 9 included mice (mice that had an ADT  $\leq$  50 mW)  
11 were successfully kindled. But only the data from 2 mice, which have verified correct  
12 positions for all electrodes, were used for further analysis.

13

#### 14 **In-vivo electrophysiological recording**

15 We recorded in-vivo electrophysiological signals which were band-passed from 0.1 to  
16 3000 Hz with a 40 dB/decade cut-off rate filter and a 60 Hz notch amplified with  
17 1400 gain through an analog amplifier (Model 3600, A-M System, USA), and then  
18 digitized with a sampling rate of 25 kHz (DataWave Technologies, USA). To  
19 separated local field potentials (LFPs) and multi-unit spikes (MUs), signals were  
20 passed through a Butterworth 2<sup>nd</sup> order infinite impulse response (IIR) filter with 6  
21 dB/oct roll-off to get LFPs (100 Hz low-pass) and MUs (300 Hz high-pass)  
22 simultaneously during, or through a finite impulse response (FIR) filter after, the  
23 recordings. A 3-axis accelerometer (Analog Devices, USA) was anchored to the  
24 headstage (Plexon, USA), measured the acceleration of gravity in tilt-sensing as a  
25 motion sensor. The mechanical signals of acceleration of gravity were then converted

1 to voltage signal and input into amplifier with the same filter and amplification  
2 setting.

3

#### 4 **Signal analysis**

5 LFPs signals were down-sampled to 500 Hz, and characterized in the frequency  
6 domain by power spectrum density (PSD) function in Welch's method with Hamming  
7 window (with a window length of 1024 points and half of the data overlapped, giving  
8 the resolution of 0.488 Hz in each signals; pCLAMP 10, MDS Analytical  
9 Technologies, USA). For time-frequency analysis, the first 10-sec segment was taken  
10 for analysis and then shifted by 1 sec for the next 10-sec segment until the completion  
11 of the full-length signal. Coherence analysis between each two signals was processed  
12 under function *mscohere* in Matlab (Mathworks, Natick, USA), defined by squared  
13 cross-spectrum between the two signals, and divided by the auto-spectrum of each  
14 signal. The value of coherence is between 0 to 1, where 1 indicates that one signal can  
15 be linearly transformed into the other one in the frequency domain, and 0 means  
16 completely lack of linear relationship. For phase analysis, we calculated instantaneous  
17 phase of FIR filter with 21<sup>st</sup> order Hamming window filtered delta (1-5 Hz) band of  
18 LFPs via Hilbert transform (Neuroexplorer, Nex Technologies, USA). If two signals  
19 were synchronized, then they have linear correlations in statistics ( $r = 1$  for positive  
20 correlation and  $= -1$  for negative correlation). The coefficient of determination ( $R^2$ )  
21 denotes the square of  $r$ , which ranges from 0 to 1 and indicates how well the real  
22 values of one signal could fit with the other one with a linear prediction.  
23 To evaluate the synchrony between the MU activities in bilateral BLAs, we took the  
24 interspike distance ("SPIKE-distance") in the time axis as the key estimator (Kreuz *et*  
25 *al.*, 2013). The analysis is done by a graphical user interface in Matlab, SPIKY, which

1 is provided online (Kreuz *et al.*, 2015). SPIKE-distance is derived from the distance  
2 between two neighbor spikes in the first train and the closest one in the second train  
3 for each spike, and then applied to calculate the “dissimilarity” score (S), which  
4 signals the desynchrony of firing patterns rather than single event synchronization.  
5 The value of S is between zero and one, and is addressed to measure the differences  
6 of timing between two spike trains instantaneously. Zero indicates that the two spike  
7 trains are identical or fully synchronized (i.e. no SPIKE-distance differences between  
8 the two spikes trains), and one indicates a fully desynchronized condition. We then  
9 denote 1 minus S as “similarity”, which serves as a more straightforward indicator of  
10 the degree of synchronization between the two spike trains. To sorting the single units,  
11 the spikes in MUs were detected under a threshold detection algorithm. Specifically,  
12 MUs were calculated for average and standard deviation for negative peaks.  
13 Three-sigma rule were then applied to extract spikes (i.e. those  $>3$  SD were detected  
14 and taken as spikes) (SciWorks 10.0, DataWave Technologies, USA). The extracted  
15 spikes were subsequently calculated under principle component analysis (PCA)  
16 algorithm, and generated waveform boundary clusters on a PC1 vs. PC2 plane. Any  
17 waveform that falls below the upper waveform boundary and above the lower  
18 waveform boundary will be considered as part of the cluster. The criteria of waveform  
19 boundary clustering are as follows: waveform deviation  $\leq 3$  SD, inter-cluster deviation  
20  $\leq 3$  SD, and mean spike number per cluster  $\geq 3$ . To display the LFPs-SUs coupling  
21 during afterdischarges, we set the timestamp of each single unit spike as the zero time  
22 points, and the oscillating waves in LFP recordings in the flanking 1-sec (0.5 sec on  
23 each side) period are realigned and then averaged to get spike-triggered average (STA)  
24 waveforms (Neuroexplorer, Nex Technologies, USA). We also calculated

1 probabilities of each sorted single unit firing in a given phase of the delta cycle. For  
2 this purpose, the original data obtained with digitization at 25 kHz were band-filtered  
3 into the delta band (1-5 Hz) were computed for their instantaneous phase via Hilbert  
4 transform, with each zero phase timestamp taken as the start of a periodic fluctuation.  
5 We then documented the spike timestamps at the instantaneous phase of each cycle  
6 (Neuroexplorer, Nex Technologies, USA), and plotted spike probabilities as vectors  
7 in different degrees. Vectors in each epoch were calculated based on their mean  
8 magnitude and direction to get the mean resultant vector in the custom Matlab codes.  
9 The magnitude of the mean resultant vector is defined as phase-locking value (PLVs),  
10 and the direction of the mean vector is given in the figures in degree. Only those units  
11 with a spike count  $\geq 5$  in each epoch were addressed by this analysis.

12

### 13 **Brain slice preparation**

14 Wild-type C57BL/6 of both sexes (aged p20-28) were decapitated under isoflurane  
15 anesthesia to obtain the brain which was placed into ice-cold oxygenated choline-based  
16 cutting solution (containing [in mM] 87 NaCl, 37.5 choline chloride, 25 NaHCO<sub>3</sub>, 25  
17 glucose, 2.5 KCl, 1.25 NaH<sub>2</sub>PO<sub>4</sub>, 7 MgCl<sub>2</sub>, and 0.5 CaCl<sub>2</sub>). Coronal slices containing  
18 BLA (Niittykoski *et al.*, 2004; Sosulina *et al.*, 2010) (270  $\mu$ m in thickness) were cut on  
19 a vibratome (VT1200S, Leica, Germany), and oxygenated in the cutting solution for 20  
20 minutes at 30°C and then in saline (containing [in mM] 125 NaCl, 26 NaHCO<sub>3</sub>, 25  
21 glucose, 2.5 KCl, 1.25 NaH<sub>2</sub>PO<sub>4</sub>, 1 MgCl<sub>2</sub>, and 2 CaCl<sub>2</sub>) for 20 minutes at 30°C before  
22 electrophysiological experiments.

23

### 24 **Electrophysiological recording and electrical stimulation in brain slices**

25 The slice was then placed in the recording chamber perfused with oxygenated (95%



1 O<sub>2</sub>/5% CO<sub>2</sub>) saline by a peristaltic pump (Gilson Medical Electric, USA) at a stable rate  
2 approximately ~5 ml/min. A ×4 objective was used to visualize BLA, and individual  
3 neurons were seen with a ×60 water immersion objective on an upright microscope  
4 (BX51WI, Olympus, Japan) and were recorded in whole-cell current-clamp mode at  
5 room temperature with 3-6 MΩ borosilicate pipettes containing K<sup>+</sup>-based solution (in  
6 mM, 116 KMeSO<sub>4</sub>, 6 KCl, 2 NaCl, 20 HEPES, 0.5 EGTA, 4 MgATP, 0.3 NaGTP, 10  
7 NaPO<sub>4</sub> creatine, and pH 7.25 adjusted with KOH). A micropipette puller  
8 (DMZ-Zeitz-Puller, Germany) was used to make the recording electrodes of  
9 borosilicate capillaries (1.65-mm outer diameter, 1.28-mm inner diameter, Harvard  
10 Apparatus, USA). Kindling-like stimulation (Goddard *et al.*, 1969; Tuunanen *et al.*,  
11 1997) applied in BLA (1-s train of 0.4-ms monophasic rectangular pulse at frequency  
12 of 60 Hz at an intensity of 400 μA, World Precision Instruments A356) was performed  
13 by using a paired electrode filled with 0.9% NaCl. The stimulating electrode was  
14 placed within the BLA tissue and the grounding electrode placed right above but not  
15 touching the surface of BLA slice. We always waited for 4 minutes to ensure full  
16 recovery (most neurons can fully recover within 2 minutes after stimulation) between  
17 each stimulation session. The signals were amplified with a Multiclamp 700B or  
18 axopatch 200B amplifier (MDS Analytical Technologies, USA), sampled at 20 kHz,  
19 filtered at 5 kHz, and digitized at 10-20 kHz with a Digidata-1440 analog/digital  
20 interface along with pCLAMP software (MDS Analytical Technologies, USA).  
21 Usually a current-clamp recording with good quality would last at least 60 min. In  
22 pair-recordings, the two neurons are always no more than 300 μm apart.

23

## 24 **Identification of BLA pyramidal neurons and interneurons**

25 Neurons in BLA can be separated into two groups, namely pyramidal neurons, and

1 non-pyramidal or interneurons (Sah *et al.*, 2003). After membrane breakthrough, a  
2 depolarizing step current of sufficient magnitude (Mahanty and Sah, 1998) is injected  
3 at membrane potential of -60 mV to elicit cellular discharges. Interneurons have  
4 smaller diameter and little or no spike frequency adaptation whereas pyramidal neurons  
5 possess longer diameter and exhibit prominent spike frequency adaptation in response  
6 to current injection (Washburn and Moises, 1992; Rainnie *et al.*, 1993; Mahanty and  
7 Sah, 1998; Sah *et al.*, 2003; Spampanato *et al.*, 2011). In this study, we would like to  
8 focus on parvalbumin-containing (PV+) INs because they may critically involve in  
9 network synchrony in BLA as well as in other structures (Muller *et al.*, 2005;  
10 Woodruff and Sah, 2007a; Woodruff and Sah, 2007b; Spampanato *et al.*, 2011;  
11 Tremblay *et al.*, 2016). Although some reports have showed that the PV+ INs may  
12 have heterogeneous electrophysiological properties, the majority of PV+ INs exhibits  
13 no spike frequency adaptation in response to depolarizing step current injection  
14 (Rainnie *et al.*, 2006; Woodruff and Sah, 2007a). There are even studies with PV+ INs  
15 never showing spike adaptation injected with depolarizing current (Woodruff and Sah,  
16 2007b; Chu *et al.*, 2012). On the other hand, it is generally accepted that PNs show  
17 spike adaptation with depolarizing pulses (Sah *et al.*, 2003). We thus limited the  
18 sampled INs to those showing no spike frequency adaptation to decrease the  
19 likelihood of erroneous inclusion of PNs. We also visualized the morphology of  
20 pyramidal neurons and interneurons with immunofluorescent confocal imaging  
21 performed on the same acute brain slices used for electrophysiological recordings  
22 following protocols developed by McLeod and colleagues (McLeod *et al.*, 2017).  
23 With confocal microscopy (LSM780, Zeiss, Germany), pyramidal neurons and  
24 interneurons were identified by immunopositivity of Ca<sup>2+</sup>/calmodulin-dependent  
25 protein kinase II antibody (CaMKII, 1:1000; Biorbyt, UK) and parvalbumin (PV,

1 1:1000; Synaptic Systems), as well as specific fluorescence in glutamatergic and  
2 GABAergic neurons in Thy1-ChR2-eYFP and Gad2-Cre;Ai32 mice, respectively.  
3 Ai32 (#024109), Gad2-Cre (#010802) and Thy1-ChR2-eYFP (#007612) transgenic  
4 mice were from Jackson Laboratory. In addition, we also used recording electrodes to  
5 fill BLA neurons with high concentration (0.4%, for faster labeling) of Lucifer Yellow  
6 CH, lithium Salt (Thermo Fisher Scientific, USA) in K<sup>+</sup>-based solution, and identified  
7 their morphology on a fluorescence microscope. As a working definition, the smaller  
8 (longest diameter  $\leq 10 \mu\text{m}$ ) neurons of non-pyramidal morphology that showed little  
9 spike frequency adaptation were then identified as interneurons, while larger neurons  
10 (longest diameter  $>12 \mu\text{m}$ ) of pyramidal morphology that exhibit spike frequency  
11 adaptation were identified as pyramidal neurons.

12

### 13 **In-vitro data analysis**

14 All brain slice recording data were analyzed with pCLAMP 10 (MDS Analytical  
15 Technologies, USA), SigmaPlot 12 (Systat Software Inc., USA) and Excel 2013  
16 (Microsoft, USA) software. The definition of burst is modified from Rainnie's group  
17 (Rainnie et al., 1993) to count the number of burst discharges in slice recording data.  
18 Postsynaptic events having at least one spike on top of rapidly summing  
19 high-frequency EPSPs were defined as burst discharges (Rainnie et al., 1993). Only  
20 EPSPs and IPSPs with amplitude greater than 3 mV were included in analysis. When  
21 two cells were recorded simultaneously, any two postsynaptic events (burst  
22 discharges, EPSPs or IPSPs, each from different neurons in a pair-recording) recorded  
23 in the two cells, respectively, having a difference in the onset time  $<50 \text{ ms}$  are defined  
24 as synchronized events. For the pre-kindling and post-kindling parameters, each  
25 analysis was based on the data averaged from a 45-sec continuous stable recording just

1 before and after the stimuli, respectively. The burst duration and inter-burst interval  
2 were measured and analyzed in pCLAMP 10. The sample size denotes the number of  
3 neurons.

4

#### 5 **Statistics**

6 Mann-Whitney U test and Wilcoxon signed-rank test were used for statistical  
7 comparison (Prism 6, GraphPad, USA), which were two-sided and the p-values <  
8 0.05 were accepted as significant difference. The software used to analysis are Prism  
9 6.01 (GraphPad, USA) and PASW statistics for windows, version 18.0 (SPSS, USA)  
10 for in-vivo and in-vitro data, respectively. All data are shown as means  $\pm$  SEM.

11

## 1 **Supplemental References**

- 2 Chu, H.Y., Ito, W., Li, J., Morozov, A. (2012). Target-specific suppression of GABA  
3 release from parvalbumin interneurons in the basolateral amygdala by  
4 dopamine. *Journal of Neuroscience*, 32(42), 14815-14820.
- 5 Goddard G.V., McIntyre D.C., Leech C.K. (1969). A permanent change in brain  
6 function resulting from daily electrical stimulation. *Exp Neurol* 25(3):  
7 295-330.
- 8 Kreuz T., Chicharro D., Houghton C., Andrzejak R.G., Mormann F. (2013).  
9 Monitoring spike train synchrony. *J Neurophysiol* 109(5): 1457–72.
- 10 Kreuz T., Mulansky M., Bozanic N. (2015). SPIKY: a graphical user interface for  
11 monitoring spike train synchrony. *J Neurophysiol* 113(9): 3432–45.
- 12 Mahanty N.K., Sah P.J.N. (1998). Calcium-permeable AMPA receptors mediate  
13 long-term potentiation in interneurons in the amygdala. *Nature* 394(6694):  
14 683–7.
- 15 McLeod F., Marzo A., Podpolny M., Galli S., Salinas P. (2017). Evaluation of  
16 Synapse Density in Hippocampal Rodent Brain Slices. *Jove-J. Vis. Exp.* 128,  
17 e56153.
- 18 Morales, J.C., Alvarez-Ferradas C., Roncagliolo M., Fuenzalida M., Wellmann M.,  
19 Nualart F.J., Bonansco C. (2014). A new rapid kindling variant for induction

1 of cortical epileptogenesis in freely moving rats. *Front Cell Neurosci* 8: 200.

2 Muller J.F., Mascagni F., McDonald A.J. (2005). Coupled networks of  
3 parvalbumin-immunoreactive interneurons in the rat basolateral amygdala. *J.*  
4 *Neurosci.* 25, 7366-7376.

5 Jasnow A.M., Ehrlich D.E., Choi D.C., Dabrowska J., Bowers M.E., McCullough  
6 K.M., Rainnie D.G., Ressler K.J. (2013). Thy1-Expressing Neurons in the  
7 Basolateral Amygdala May Mediate Fear Inhibition. *J Neurosci* 33(25),  
8 10396-10404.

9 Racine R.J. (1972). Modification of seizure activity by electrical stimulation: II.  
10 Motor seizure. *Electroencephal Clin Neurophysiol* 32(3): 281–94.

11 Rainnie D.G., Asproдини E.K., Shinnick-Gallagher P. (1993). Intracellular recordings  
12 from morphologically identified neurons of the basolateral amygdala. *J*  
13 *Neurophysiol* 69(4): 1350–62.

14 Rainnie D.G., Mania I., Mascagni F., McDonald A.J. (2006). Physiological and  
15 morphological characterization of parvalbumin-containing interneurons of the  
16 rat basolateral amygdala. *Journal of Comparative Neurology*, 498(1), 142-161.

17 Sah P., Faber E.S., Lopez De Armentia M., Power J. (2003). The amygdaloid  
18 complex: anatomy and physiology. *Physiol Rev* 83(3): 803–34.

19 Spampanato J., Polepalli J., Sah P. (2011). Interneurons in the basolateral amygdala.

- 1           Neuropharmacology 60(5): 765–73.
- 2   Tremblay R., Lee S., Rudy B. (2016). GABAergic interneurons in the neocortex: from  
3           cellular properties to circuits. *Neuron*, 91(2), 260-292.
- 4   Tuunanen J., Halonen T., Pitkänen A. Decrease in somatostatin-immunoreactive  
5           neurons in the rat amygdaloid complex in a kindling model of temporal lobe  
6           epilepsy (1997). *Epilepsy Res* 26(2): 315–27.
- 7   Washburn M.S., Moises H.C. (1992). Electrophysiological and morphological  
8           properties of rat basolateral amygdaloid neurons in vitro. *J Neurosci* 12(10):  
9           4066–79.
- 10   Woodruff A.R., Sah P. (2007a). Networks of parvalbumin-positive interneurons in the  
11           basolateral amygdala. *J Neurosci* 27(3): 553–563.
- 12   Woodruff A.R., Sah P. (2007b). Inhibition and synchronization of basal amygdala  
13           principal neuron spiking by parvalbumin-positive interneurons. *J*  
14           Neurophysiol 98(5): 2956–61.
